# Supplementary material for: Oxic-anoxic regime shifts mediated by feedbacks between biogeochemical processes and microbial community dynamics
Source: Springer Nature journal article supplement (doi:10.1038/s41467-017-00912-x), 2017-09-29
Supplement: MOESM1 [file 41467_2017_912_MOESM1_ESM.pdf]

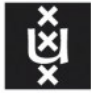

## UvA-DARE (Digital Academic Repository)

### Oxic-anoxic regime shifts mediated by feedbacks between biogeochemical processes and microbial community dynamics

Bush, T. ; Diao, M.; Allen, R.J.; Sinnige, R.; Muijzer, G.; Huisman, J.

**DOI**

[10.1038/s41467-017-00912-x](https://doi.org/10.1038/s41467-017-00912-x)

**Publication date**

2017

**Document Version**

Other version

**Published in**

Nature Communications

[Link to publication](#)

**Citation for published version (APA):**

Bush, T., Diao, M., Allen, R. J., Sinnige, R., Muijzer, G., & Huisman, J. (2017). Oxic-anoxic regime shifts mediated by feedbacks between biogeochemical processes and microbial community dynamics. *Nature Communications*, 8, Article 789. <https://doi.org/10.1038/s41467-017-00912-x>

**General rights**

It is not permitted to download or to forward/distribute the text or part of it without the consent of the author(s) and/or copyright holder(s), other than for strictly personal, individual use, unless the work is under an open content license (like Creative Commons).

**Disclaimer/Complaints regulations**

If you believe that digital publication of certain material infringes any of your rights or (privacy) interests, please let the Library know, stating your reasons. In case of a legitimate complaint, the Library will make the material inaccessible and/or remove it from the website. Please Ask the Library: <https://uba.uva.nl/en/contact>, or a letter to: Library of the University of Amsterdam, Secretariat, P.O. Box 19185, 1000 GD Amsterdam, The Netherlands. You will be contacted as soon as possible.

*UvA-DARE is a service provided by the library of the University of Amsterdam (<https://dare.uva.nl>)*

**Supplementary Figure 1. Hysteresis loops for different depths in Lake Vechten.** The graphs plot the oxygen saturation level against the inverse of the stratification strength ( $1/N^2$ , where  $N^2$  is the squared buoyancy frequency). The inverse of the stratification strength provides a simple proxy of oxygen diffusivity across the thermocline (see Methods). A hysteresis loop is found irrespective of whether oxygen saturation is measured at a depth of **a**, 2 m; **b**, 5 m; **c**, 6 m; **d**, 7 m; **e**, 9 m. Data points are from March 2013 to March 2014; arrows indicate the direction of time.

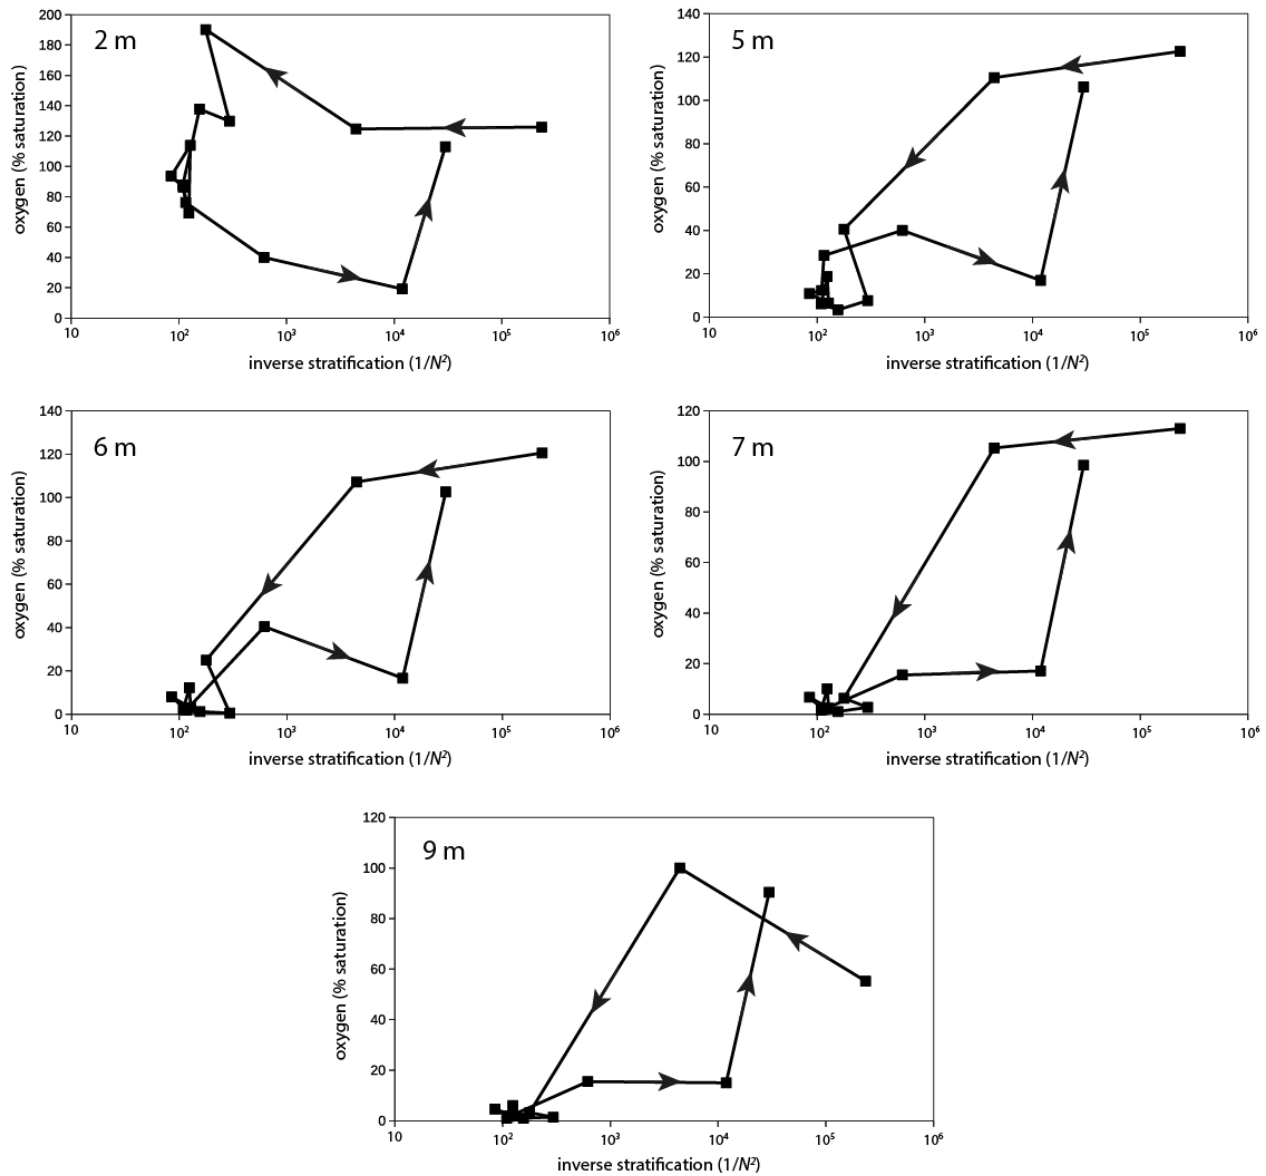

**Supplementary Table 1.** Parameter values of the model.

| Parameter      | Meaning                                           | Value                                                | Reference |
|----------------|---------------------------------------------------|------------------------------------------------------|-----------|
| $g_{\max, CB}$ | Maximum specific growth rate of CB                | 0.05 hr <sup>-1</sup>                                | 1         |
| $g_{\max, PB}$ | Maximum specific growth rate of PB                | 0.07 hr <sup>-1</sup>                                | 2         |
| $g_{\max, SB}$ | Maximum specific growth rate of SB                | 0.1 hr <sup>-1</sup>                                 | 3,4       |
| $K_{PB, SR}$   | Half-saturation constant of PB on reduced sulfur  | 10 μM                                                | 5         |
| $K_{SB, SO}$   | Half-saturation constant of SB on oxidized sulfur | 5 μM                                                 | 6         |
| $K_{CB, P}$    | Half-saturation constant of CB on phosphorus      | 0.2 μM                                               | 7         |
| $K_{PB, P}$    | Half-saturation constant of PB on phosphorus      | 0.5 μM                                               | 8         |
| $K_{SB, P}$    | Half-saturation constant of SB on phosphorus      | 0.5 μM                                               | -         |
| $H_{CB, SR}$   | Half-inhibition constant of CB on reduced sulfur  | 300 μM                                               | 9         |
| $H_{PB, O}$    | Half-inhibition constant of PB on oxygen          | 100 μM                                               | 10        |
| $H_{SB, O}$    | Half-inhibition constant of SB on oxygen          | 100 μM                                               | 10        |
| $y_{SB}^{SO}$  | Yield of SB on oxidized sulfur                    | 3.33×10 <sup>7</sup> cells μM <sup>-1</sup>          | 11        |
| $y_{PB}^{SR}$  | Yield of PB on reduced sulfur                     | 1.25×10 <sup>7</sup> cells μM <sup>-1</sup>          | 9         |
| $y_{CB}^P$     | Yield of CB on phosphorus                         | 1.67×10 <sup>8</sup> cells μM <sup>-1</sup>          | 12        |
| $y_{PB}^P$     | Yield of PB on phosphorus                         | 1.67×10 <sup>8</sup> cells μM <sup>-1</sup>          | -         |
| $y_{SB}^P$     | Yield of SB on phosphorus                         | 1.67×10 <sup>8</sup> cells μM <sup>-1</sup>          | -         |
| $p_{CB}$       | Production of oxygen per cyanobacterial cell      | 6×10 <sup>-9</sup> μM cell <sup>-1</sup>             | 13        |
| $m_{CB}$       | Mortality rate of CB                              | 0.020 hr <sup>-1</sup>                               | -         |
| $m_{PB}$       | Mortality rate of PB                              | 0.028 hr <sup>-1</sup>                               | -         |
| $m_{SB}$       | Mortality rate of SB                              | 0.040 hr <sup>-1</sup>                               | -         |
| $\alpha_S$     | Diffusivity of sulfur                             | 0.001 hr <sup>-1</sup>                               | -         |
| $\alpha_O$     | Diffusivity of oxygen                             | 10 <sup>-6</sup> – 10 <sup>-2</sup> hr <sup>-1</sup> | -         |
| $\alpha_P$     | Diffusivity of phosphorus*                        | 0.01 hr <sup>-1</sup>                                | -         |
| $S_{R,b}$      | Background concentration of reduced sulfur        | 300 μM                                               | 14        |
| $S_{O,b}$      | Background concentration of oxidized sulfur       | 300 μM                                               | 14        |
| $O_b$          | Background concentration of oxygen                | 300 μM                                               | 15        |
| $P_b$          | Background concentration of phosphorus            | 2 – 10 μM                                            | 16        |
| $c$            | Oxidation rate of reduced sulfur                  | 4×10 <sup>-5</sup> μM <sup>-1</sup> hr <sup>-1</sup> | 17,18     |

CB = cyanobacteria; PB = phototrophic sulfur bacteria; SB = sulfate-reducing bacteria

\*We assumed a higher diffusive influx for phosphorus than for sulfur and oxygen, because the phosphorus influx also includes phosphorus release from the sediment and remineralization from dead biomass.

### Supplementary References

1. Paerl, H. W. & Huisman, J. Climate change: a catalyst for global expansion of harmful cyanobacterial blooms. *Env. Microb. Rep.* **1**, 27–37 (2009).
2. Montesinos, E. Change in size of *Chromatium minus* cells in relation to growth rate, sulfur content, and photosynthetic activity: a comparison of pure cultures and field populations. *Appl. Environ. Microbiol.* **53**, 864–871 (1987).

3. Kalyuzhnyi, S., Fedorovich, V., Lens, P., Hulshoff Pol, L. & Lettinga, G. Mathematical modelling as a tool to study population dynamics between sulfate reducing and methanogenic bacteria. *Biodegradation* **9**, 187–199 (1998).
4. Dev, S., Roy, S. & Bhattacharya, J. Understanding the performance of sulfate reducing bacteria based packed bed reactor by growth kinetics study and microbial profiling. *J. Environ. Manag.* **177**, 101–110 (2016).
5. Van Gemerden, H. The sulfide affinity of phototrophic bacteria in relation to the location of elemental sulfur. *Arch. Microbiol.* **139**, 289–294 (1984).
6. Ingvorsen, K., Zehnder, A. J. B. & Jørgensen, B. B. Kinetics of sulfate and acetate uptake by *Desulfobacter postgatei*. *Appl. Environ. Microbiol.* **47**, 403–408 (1984).
7. Kromkamp, J., Van den Heuvel, A. & Mur, L. R. Phosphorus uptake and photosynthesis by phosphate-limited cultures of the cyanobacterium *Microcystis aeruginosa*. *Br. Phycol. J.* **24**, 347–355 (1989).
8. Bañeras, L., Ros-Ponsatí, M., Cristina, X. P., Garcia-Gil, J. L. & Borrego, C. M. Phosphorus deficiency and kinetics of alkaline phosphatase in isolates and natural populations of phototrophic sulphur bacteria. *FEMS Microbiol. Ecol.* **73**, 243–253 (2010).
9. De Wit, R., Van den Ende, F. P. & Van Gemerden, H. Mathematical simulation of the interactions among cyanobacteria, purple sulfur bacteria and chemotrophic sulfur bacteria in microbial mat communities. *FEMS Microbiol. Ecol.* **17**, 117–136 (1995).
10. Gerritse, J., Schut, F. & Gottschal, J. C. Modelling of mixed chemostat cultures of an aerobic bacterium, *Comamonas testosteroni*, and an anaerobic bacterium, *Veillonella alcalescens*: comparison with experimental data. *Appl. Environ. Microbiol.* **58**, 1466–1476 (1992).
11. Jin, Q. & Bethke, C. M. The thermodynamics and kinetics of microbial metabolism. *Am. J. Sci.* **307**, 643–677 (2007).
12. Saxton, M. A., Arnold, R. J., Bourbonniere, R. A., McKay, R. M. L. & Wilhelm, S. W. Plasticity of total and intracellular phosphorus quotas in *Microcystis aeruginosa* cultures and Lake Erie algal assemblages. *Front. Microbiol.* **3**, 3 (2012).
13. Gons, H. J. & Rijkeboer, M. The ‘true’ growth efficiency of phytoplankton as influenced by light attenuation and insolation: implications of the photosynthesis-irradiance relationship. *Hydrobiol.* **238**, 169–176 (1992).
14. Goldhaber, M. B. Sulfur-rich sediments. *Treatise on Geochemistry* **7**, 257–288 (2003).
15. Shaffer, G., Olsen, S. M. & Pedersen, J. O. P. Long-term ocean oxygen depletion in response to carbon dioxide emissions from fossil fuels. *Nat. Geosci.* **2**, 105–109 (2009).
16. Ruttenger, K. C. The global phosphorus cycle. *Treatise on Geochemistry* **8**, 585–643 (2003).
17. Luther, G. W. *et al.* Thermodynamics and kinetics of sulfide oxidation by oxygen: a look at inorganically controlled reactions and biologically mediated processes in the environment. *Front. Microbiol.* **2**, 62 (2011).
18. Millero, F. J., Hubinger, S., Fernandez, M. & Garnett, S. Oxidation of H<sub>2</sub>S in seawater as a function of temperature, pH, and ionic strength. *Environ. Sci. Technol.* **21**, 439–443 (1987).
